# Supplementary material
Source: publisher figshare collection journal article supplement (https://karger.figshare.com/ndownloader/files/25982150)
Supplement: Supplementary file 1 [file 25982150]

| Supplementary Table 1: Area Under Curve (AUC), Sensitivity and Specificity for different test combinations | | | | | |
| --- | --- | --- | --- | --- | --- |
| Test Result Variable(s) | AUC | Std. Errora | p Value | Sensitivity | Specificity |
| Composite score- TMT A & B, Category Fluency, VLT DR, PNT, and MTCF Copy & DR | .892 | .015 | < 0.001 | **0.808** | **0.800** |
| Composite score with VLT TL | .883 | .016 | < 0.001 | **0.805** | **0.840** |
| VLT DR + CF | .797 | .019 | < 0.001 | 0.810 | 0.665 |
| VLT TL + CF | .768 | .022 | < 0.001 | 0.714 | 0.707 |
| MTCF DR + CF | .757 | .022 | < 0.001 | 0.616 | 0.780 |
| VLT TL + MTCF DR+ CF | .809 | .020 | < 0.001 | 0.758 | 0.731 |
| VLT DR + TMT | .844 | .018 | < 0.001 | 0.763 | 0.785 |
| VLT DR + MTCF DR+ CF | .823 | .018 | < 0.001 | 0.768 | 0.754 |
| VLT TL +CF + TMT | .830 | .019 | < 0.001 | 0.695 | 0.834 |
| MTCF DR +CF + TMT | .821 | .019 | < 0.001 | 0.684 | 0.812 |
| VLT TL +MTCF DR +CF + TMT | .854 | .017 | < 0.001 | 0.779 | 0.775 |
| VLT DR+MTCF DR + CF + TMT | .863 | .017 | < 0.001 | 0.774 | 0.800 |
| VLT DR + PNT | .762 | .021 | < 0.001 | 0.561 | 0.787 |
| VLT TL + PNT | .773 | .023 | < 0.001 | 0.508 | 0.885 |
| MTCF DR + PNT | .718 | .024 | < 0.001 | 0.489 | 0.826 |
| VLT DR+ MTCF COPY | .817 | .019 | < 0.001 | 0.746 | 0.716 |
| VLT TL + MTCF COPY | .827 | .019 | < 0.001 | 0.725 | 0.740 |
| MTCF COPY & DR + VLT TL | .828 | .020 | < 0.001 | 0.683 | 0.815 |
| MTCF COPY & DR + VLT DR | .819 | .020 | < 0.001 | 0.661 | 0.823 |
| MTCF COPY&DR | .766 | .023 | < 0.001 | 0.698 | 0.725 |
| VLT DR + TMT | .844 | .018 | < 0.001 | 0.763 | 0.785 |
| VLT TL + TMT | .831 | .020 | < 0.001 | 0.742 | 0.785 |
| MTCF DR + TMT | .804 | .020 | < 0.001 | 0.695 | 0.772 |
| MTCF DR + TMT + VLT DR | .850 | .017 | < 0.001 | 0.758 | 0.783 |
| MTCF DR TMT+ VLT TL | .847 | .018 | < 0.001 | 0.711 | 0.834 |
| VLT DR + PNT+ MTCF COPY | .809 | .020 | < 0.001 | 0.684 | 0.745 |
| PNT + VLT TL + MTCF COPY | .828 | .020 | < 0.001 | 0.579 | 0.895 |
| MTCF DR & COPY + PNT | .767 | .022 | < 0.001 | 0.633 | 0.750 |
| MTCF DR & COPY + PNT+ VLT DR | .814 | .019 | < 0.001 | 0.621 | 0.808 |
| MTCF DR & COPY + PNT+ VLT TL | .828 | .020 | < 0.001 | 0.616 | 0.872 |
| MTCF COPY + TMT + VLT DR | .878 | .016 | < 0.001 | 0.695 | 0.870 |
| MTCF COPY + TL +TMT | .881 | .016 | < 0.001 | 0.732 | 0.856 |
| MTCF DR & COPY+ TMT +VLT DR | .873 | .016 | < 0.001 | 0.732 | 0.840 |
| MTCF DR & COPY+ TMT +VLT TL | .879 | .016 | < 0.001 | 0.774 | 0.818 |
| MTCF COPY + TMT + VLT DR+ CF | .890 | .015 | < 0.001 | 0.779 | 0.842 |
| MTCF COPY + TMT + VLT TL + CF | .881 | .016 | < 0.001 | 0.816 | 0.775 |
| MTCF DR & COPY+ TMT +VLT DR + CF | .888 | .015 | < 0.001 | 0.789 | 0.832 |
| MTCF DR &COPY+ TMT +VLT TL + CF | .884 | .016 | < 0.001 | 0.668 | 0.935 |
| Note: TMT: Trail Making Test; VLT: Verbal Learning Test; TL: Total Learning; DR: Delayed Recall; CF: Category Fluency; PNT: Picture Naming Test; MTCF: Modified Taylor Complex Figure Test | | | | | |
|  | | | | | |

| Supplementary Table 1: AUC, Sensitivity and Specificity for different test combinations | | | | | |
| --- | --- | --- | --- | --- | --- |
| Test Result Variable(s) | Area Under Curve | Std. Errora | p Value | Sensitivity | Specificity |
| Composite score- TMT A & B, Category Fluency, VLT DR, PNT, and MTCF Copy & DR | .892 | .015 | < 0.001 | **0.808** | **0.800** |
| Composite score with VLT TL | .883 | .016 | < 0.001 | **0.805** | **0.840** |
| VLT DR + CF | .797 | .019 | < 0.001 | 0.810 | 0.665 |
| VLT TL + CF | .768 | .022 | < 0.001 | 0.714 | 0.707 |
| MTCF DR + CF | .757 | .022 | < 0.001 | 0.616 | 0.780 |
| VLT TL + MTCF DR+ CF | .809 | .020 | < 0.001 | 0.758 | 0.731 |
| VLT DR + TMT | .844 | .018 | < 0.001 | 0.763 | 0.785 |
| VLT DR + MTCF DR+ CF | .823 | .018 | < 0.001 | 0.768 | 0.754 |
| VLT TL +CF + TMT | .830 | .019 | < 0.001 | 0.695 | 0.834 |
| MTCF DR +CF + TMT | .821 | .019 | < 0.001 | 0.684 | 0.812 |
| VLT TL +MTCF DR +CF + TMT | .854 | .017 | < 0.001 | 0.779 | 0.775 |
| VLT DR+MTCF DR + CF + TMT | .863 | .017 | < 0.001 | 0.774 | 0.800 |
| VLT DR + PNT | .762 | .021 | < 0.001 | 0.561 | 0.787 |
| VLT TL + PNT | .773 | .023 | < 0.001 | 0.508 | 0.885 |
| MTCF DR + PNT | .718 | .024 | < 0.001 | 0.489 | 0.826 |
| VLT DR+ MTCF COPY | .817 | .019 | < 0.001 | 0.746 | 0.716 |
| VLT TL + MTCF COPY | .827 | .019 | < 0.001 | 0.725 | 0.740 |
| MTCF COPY & DR + VLT TL | .828 | .020 | < 0.001 | 0.683 | 0.815 |
| MTCF COPY & DR + VLT DR | .819 | .020 | < 0.001 | 0.661 | 0.823 |
| MTCF COPY&DR | .766 | .023 | < 0.001 | 0.698 | 0.725 |
| VLT DR + TMT | .844 | .018 | < 0.001 | 0.763 | 0.785 |
| VLT TL + TMT | .831 | .020 | < 0.001 | 0.742 | 0.785 |
| MTCF DR + TMT | .804 | .020 | < 0.001 | 0.695 | 0.772 |
| MTCF DR + TMT + VLT DR | .850 | .017 | < 0.001 | 0.758 | 0.783 |
| MTCF DR TMT+ VLT TL | .847 | .018 | < 0.001 | 0.711 | 0.834 |
| VLT DR + PNT+ MTCF COPY | .809 | .020 | < 0.001 | 0.684 | 0.745 |
| PNT + VLT TL + MTCF COPY | .828 | .020 | < 0.001 | 0.579 | 0.895 |
| MTCF DR & COPY + PNT | .767 | .022 | < 0.001 | 0.633 | 0.750 |
| MTCF DR & COPY + PNT+ VLT DR | .814 | .019 | < 0.001 | 0.621 | 0.808 |
| MTCF DR & COPY + PNT+ VLT TL | .828 | .020 | < 0.001 | 0.616 | 0.872 |
| MTCF COPY + TMT + VLT DR | .878 | .016 | < 0.001 | 0.695 | 0.870 |
| MTCF COPY + TL +TMT | .881 | .016 | < 0.001 | 0.732 | 0.856 |
| MTCF DR & COPY+ TMT +VLT DR | .873 | .016 | < 0.001 | 0.732 | 0.840 |
| MTCF DR & COPY+ TMT +VLT TL | .879 | .016 | < 0.001 | 0.774 | 0.818 |
| MTCF COPY + TMT + VLT DR+ CF | .890 | .015 | < 0.001 | 0.779 | 0.842 |
| MTCF COPY + TMT + VLT TL + CF | .881 | .016 | < 0.001 | 0.816 | 0.775 |
| MTCF DR & COPY+ TMT +VLT DR + CF | .888 | .015 | < 0.001 | 0.789 | 0.832 |
| MTCF DR &COPY+ TMT +VLT TL + CF | .884 | .016 | < 0.001 | 0.668 | 0.935 |
| Note: TMT: Trail Making Test; VLT: Verbal Learning Test; TL: Total Learning; DR: Delayed Recall; CF: Category Fluency; PNT: Picture Naming Test; MTCF: Modified Taylor Complex Figure Test | | | | | |
|  | | | | | |
